# Supplementary material for: The Influence of Microbiome on Urological Malignancies: A Systematic Review
Source: Preprints.org preprint supplement (doi:10.20944/preprints202309.1213.v1), 2023-09-18
Supplement: Supplementary file 1 [file supplementary]

**Identification of studies via databases and registers**

Records removed *before screening*:

Duplicate records removed
(n = 0)

Records identified from Ovid MEDLINE: Databases (n = 1)

**Identification**

Records excluded (n = 195)

Records screened (n = 347)

**Screening**

Reports assessed for eligibility

(n = 152)

**Bladder Cancer (n = 69)**
Reports excluded:

Non-human (n=7)

Wrong study type (n=24)

Wrong microbiome (n=18)

**Renal Cancer (n = 23)**
Reports excluded:

Non-human (n = 2)

Wrong study type (n = 7)

Wrong microbiome (n=10)

**Penis and Testis Cancer (n = 7)**
Reports excluded:

Non-human (n = 0)

Wrong study type (n = 6)

Wrong microbiome (n = 0)

**Prostate Cancer (n = 53)**
Reports excluded:

Non-human (n= 12)

Wrong study type (n= 15)

Wrong microbiome (n=14)

Studies included
(n = 1)

Studies included
(n = 12)

Studies included
(n = 20)

Studies included
(n = 4)

**Included**

Total studies included in review.

(n = 37)
